# Supplementary material for: Fabrication of water-floating litchi-like polystyrene-sphere-supported TiO2/Bi2O3 S-scheme heterojunction for efficient photocatalytic degradation of tetracycline
Source: Royal Society of Chemistry journal article supplement (doi:10.1039/d3mh01348k), 2023-01-01
Supplement: d3mh01348k1.pdf [file d3mh01348k1.pdf]

## Supporting Information

### **Fabrication of water-floating litchi-like polystyrene-sphere-supported TiO<sub>2</sub>/Bi<sub>2</sub>O<sub>3</sub> S-scheme heterojunction for efficient photocatalytic degradation of tetracycline**

Wensheng Zhang<sup>a†</sup>, Qingmei Tan<sup>b†</sup>, Tianren Liu<sup>b</sup>, Ying He<sup>a</sup>, Gang Chen<sup>a</sup>, Ke Chen<sup>a</sup>  
Dongxue Han<sup>a,b\*</sup>, Dongdong Qin<sup>b</sup>, and Li Niu<sup>a,c\*</sup>

<sup>a</sup>*School of Civil Engineering c/o Guangzhou Key Laboratory of Sensing Materials & Devices, Center for Advanced Analytical Science, School of Chemistry and Chemical Engineering, Guangzhou University, Guangzhou 510006, P. R. China.*

<sup>b</sup>*School of Chemistry and Chemical Engineering Guangzhou Key Laboratory of Sensing Materials & Devices, Center for Advanced Analytical Science, Guangzhou University, Guangzhou 510006, P. R. China.*

<sup>c</sup>*School of Chemical Engineering and Technology, Sun Yat-sen University, Zhuhai 519082, P. R. China.*

<sup>†</sup>*These authors contributed equally to this work: Wensheng Zhang, Qingmei Tan*

<sup>\*</sup>*email: dxhan@gzhu.edu.cn; lniu@gzhu.edu.cn*

## Experimental Procedures

### Chemicals and Materials

The styrene, hexadecylamine (HDA) and tartaric acid (TA,  $\text{H}_2\text{C}_4\text{H}_4\text{O}_6$ ) were bought from Sigma-Aldrich Chemical Co. Ltd. The ammonium persulfate (APS), 5,5-dimethyl-1-pyrroline-N-oxide (DMPO) and polyvinylpyrrolidone (PVP,  $M_w \approx 58$  kDa) were purchased from Aladdin Biochemical Technology Co. Ltd. The tetracycline hydrochloride (TC) and titanium isopropoxide ( $\text{C}_{12}\text{H}_{28}\text{O}_4\text{Ti}$ ) were bought from Macklin Reagents Co. Ltd. The bismuth nitrate pentahydrate ( $\text{Bi}(\text{NO}_3)_3 \cdot 5\text{H}_2\text{O}$ ), sodium hypophosphite ( $\text{NaH}_2\text{PO}_2$ ), sodium hydroxide (NaOH), sodium oleate (SOA), isopropyl alcohol (IPA), Triethanolamine (TEOA) were from Beijing InnoChem Technology Co. Ltd. The entire reagents were analytically pure (AR), allowing for use without additional purification.

### Apparatus

Transmission electron microscopy (TEM, JEOL 2100F) and scanning electron microscopy (SEM, JEOL JSM-7001F) were used to examine the morphology and structure of the as-prepared catalysts. A 300 W Xe lamp and the photochemical reactor were mounted on a CEL-GPPCL system (Beijing China Education Au-light Company). In situ irradiated X-ray photoelectron spectrometer (XPS, Thermo ESCALAB250Xi) was adopted to investigate the charge transfer mechanism of photocatalyst. Mott-Schottky plots were recorded using an electrochemical workstation (CHI Instruments CHI760-1). Diffuse reflection spectroscopy (DRS, HITACHI UV-3900) was used to obtain the absorption spectra. Ultraviolet-visible spectrum of TC was measured through a UV-2550 spectrophotometer (Shimadzu UV-18700). Electrochemical impedance spectroscopy (EIS) was tested via a CHI1030B electrochemical workstation. The degradation intermediate products of TC were determined using liquid

chromatography-mass spectrometry (LC-MS, Agilent 1260-6460) with electrospray positive ion mode.

### **Preparation of polystyrene spheres**

The polystyrene spheres (PS) were prepared according to the previous reference with minor improvement.<sup>S1</sup> Polymerization took place in a 100 mL round-bottom flask with magnetic stirring. The round-bottom flask was initially filled with preweighed PVP and initiator. In a typical polymerization, the mass of PVP was 0.01 g as well as the APS concentration was 15 mM. Afterward, 6.0 mL of deionized water and 50 mL of ethanol were poured into the flask. Then, a magnetic bar was used to thoroughly agitate the liquid for 10 min at room temperature. Finally, 4.4 mL of styrene monomer was added and the polymerization temperature was kept at 70°C under the condition of full agitation in the oil bath for 6 h. After polymerization is complete, any further reaction is terminated by placing round-bottom flask in ice water for 30 min. The round-bottom flask was submerged in ice water for 30 min after the polymerization process was finished to stop any potential additional reactions. After centrifuging the vial at 12,000 rpm, the resulting products were collected and repeatedly rinsed with deionized water to get rid of any remaining PVP and styrene. The final products were dried at 60°C and stored in a glass bottle for further use.

### **Synthesis of PS@TiO<sub>2</sub> composites**

550 mg of PS was ultrasonically dispersed in 175 mL ethanol for 1 h. Then, 1.6 g of HDA and 4.0 mL of NH<sub>3</sub>·H<sub>2</sub>O were added into the above solution and magnetically stirred for 30 min to form a uniform suspension. Then, 1.0 mL of titanium isopropoxide was quickly dropped into the suspension to avoid hydrolysis in air. After reaction for 1

h, the products were collected, rinsed with ethanol and deionized water alternately for several times, and then dried at 60°C for later use.

### **Synthesis of PS@TiO<sub>2</sub>/Bi<sub>2</sub>O<sub>3</sub> photocatalyst**

The PS@TiO<sub>2</sub>/Bi<sub>2</sub>O<sub>3</sub> photocatalyst was synthesized according to the previous reports with some modification.<sup>S2,S3</sup> Typically, 0.5 g of PS@TiO<sub>2</sub>, 0.6 g of tartaric acid, 5 mL of Bi(NO<sub>3</sub>)<sub>3</sub>·5H<sub>2</sub>O solution (containing 0.01 mol HNO<sub>3</sub>) with different molar mass (0.2, 0.4, 0.6 and 0.8 M, respectively) and 15 mL deionized water were mixed together, and stirred vigorously for 30 min. Next, 2.4 g of NaOH was dissolved in 35 mL deionized water, further added into the above mixture, and continued to stir at room temperature for 10 min. Then, the solution was transferred to a three-necked flask at 90°C, into which 0.015g sodium oleate was added and stirred for 10 min. Also 40 mL of 5 M NaH<sub>2</sub>PO<sub>2</sub> was added into the solution, and stirring constantly continued for 5 h. After the reaction was completed, the resulting products were collected by washing with deionized water and ethanol for several times to obtain PS@TiO<sub>2</sub>/Bi hybrids. Finally, continuous drying at 80°C for 12 h induces PS@TiO<sub>2</sub>/Bi to be gradually oxidized into PS@TiO<sub>2</sub>/Bi<sub>2</sub>O<sub>3</sub> composites. The PS@TiO<sub>2</sub> loaded with Bi<sub>2</sub>O<sub>3</sub> in varying proportions were denoted as PS@TiO<sub>2</sub>/Bi<sub>2</sub>O<sub>3</sub>-0.2, PS@TiO<sub>2</sub>/Bi<sub>2</sub>O<sub>3</sub>-0.4, PS@TiO<sub>2</sub>/Bi<sub>2</sub>O<sub>3</sub>-0.6 and PS@TiO<sub>2</sub>/Bi<sub>2</sub>O<sub>3</sub>-0.8, respectively. In addition, the single Bi<sub>2</sub>O<sub>3</sub> sample served as contrast photocatalyst was also prepared using a similar method without the addition of PS@TiO<sub>2</sub>. To facilitate the comparison, the pure TiO<sub>2</sub>/Bi<sub>2</sub>O<sub>3</sub>-0.4 composite was also fabricated using a similar procedure of “Synthesis of PS@TiO<sub>2</sub>/Bi<sub>2</sub>O<sub>3</sub>” without adding PS microspheres.

### **Electrochemical Tests**

The electrochemical test was completed via a CHI760-1 electro-chemistry workstation (Shanghai Chenhua, China) with a three-electrode cell. The glass-carbon electrode loaded catalyzer was the work electrode, and the saturated Ag/AgCl electrode and platinum foil were the reference electrode and anti-electrode, separately. The transient photocurrent response curves were harvested during the illumination (on/off) every 20 s at an applied potential of 0 V (vs Ag/AgCl) in 0.1 M Na<sub>2</sub>SO<sub>4</sub> solution from the back side of the work electrode. The electrochemical impedance spectroscopy (EIS) measurements were completed by using an AC voltage amplitude of 5 mV in the frequency range between 105 and 0.01 Hz in Na<sub>2</sub>SO<sub>4</sub> electrolyte under open circuit potential (OCP) conditions and 300 W xenon light irradiation. The Mott–Schottky (M–S) plots were implemented with the electrochemical window ranging between -1.0 to +1.5 V, using 800 or 1000 Hz as well as an AC amplitude of 10 mV at each of the potentials.

### **Electron paramagnetic resonance (EPR) measurement**

The EPR technology was used to detect free radical species such as hydroxyl radical ( $\cdot\text{OH}$ ) and superoxide radical ( $\cdot\text{O}_2^-$ ) with the assistance of 5,5-dimethyl-1-pyrroline N-oxide (DMPO). Briefly, for the detection of hydroxyl radical ( $\cdot\text{OH}$ ), the as-prepared sample was dispersed into deionized water to form a 2.5 mg mL<sup>-1</sup> suspension under ultrasonic conditions. Subsequently, 50  $\mu\text{L}$  DMPO was added into the above suspension under rapid stirring. Then, this mixture was irradiated for 5 min using a 300 W Xe lamp under the rapid agitation. After that, the supernatant of above mixture was quickly sampled and tested in the EPR equipment. Additionally, the detection procedure of superoxide radical ( $\cdot\text{O}_2^-$ ) was the same as that of hydroxyl radical ( $\cdot\text{OH}$ ), except that the deionized water was replaced by methanol.

### **Measurement of photocatalytic performances**

The photocatalytic activity of the as-prepared photocatalysts was assessed by degrading TC in water. In brief, 20 mg of photocatalyst was placed in 100 mL of TC solution (50 mg L<sup>-1</sup>). The above mixture was continually stirred in the dark for 30 min until it reaches equilibrium. Next, the photocatalytic process is conducted utilizing 300 W xenon lamp (full-pectrum) illumination while being mechanically agitated. Then, the surplus photocatalyst was removed using filter paper after a tiny amount of the reaction solution was taken out at varied irradiation intervals. The upper transparent layer was determined by recording the maximum absorbance of TC at 357 nm with a UV-visible spectrophotometer. Finally, the removal rate of TC was calculated using the following formula:

$$\eta_{\text{TC removal rate}} (\%) = (1 - C_t/C_0) \times 100\%$$

Where  $C_t$  is the TC concentration recorded during interval sampling as well as  $C_0$  is the initial TC concentration.

### **Density functional theory (DFT) calculation analysis**

Fukui function based on the density functional theory (DFT) was used to predict the regioselectivity of ROS ( $\cdot\text{OH}$  and  $\cdot\text{O}_2^-$ ) towards the TC molecules. All of the calculations were performed using the Gaussian 16 (Revision C.01) software.<sup>S4</sup> The geometry optimization and single-point energy calculations were executed using the B3LYP method with the 6-31+G(d,p) basis set. The orbital energy level analysis, electrostatic potential (ESP) analysis and Fukui function analysis were performed by Multiwfn package. Fukui function is an important concept in the conceptual density functional theory (CDFT), and it has been widely used in prediction of reactive sites of

electrophilic, nucleophilic and general radical attacks.<sup>S5</sup> Specifically, Fukui function is defined as:

$$f(r) = \left[ \frac{\partial \rho(r)}{\partial N} \right]_v \quad (1)$$

where  $\rho(r)$  is the electron density at a point  $r$  in space,  $N$  is the electron number in the present system, and the constant term  $v$  in the partial derivative is the external potential. In the condensed version of Fukui function, the atomic population number is used to represent the electron density distribution around an atom. The condensed Fukui function can be calculated as:

$$\text{Electrophilic attack: } f_A^- = q_{N-1}^A - q_N^A \quad (2)$$

$$\text{Nucleophilic attack: } f_A^+ = q_N^A - q_{N+1}^A \quad (3)$$

$$\text{Radical attack: } f_A^0 = (q_{N-1}^A - q_{N+1}^A)/2 \quad (4)$$

where  $q^A$  is the atom charge of atom  $A$  at the corresponding state. The Fukui function contains relative information about different sites of one molecule, and the reactive sites of the exact molecule usually have larger value of condensed Fukui function (CFF) than other regions. Hydroxyl radical ( $\cdot\text{OH}$ ) and superoxide radical ( $\cdot\text{O}_2^-$ ) were the primary attack reactive oxygen species (ROS), which are classified as a kind of electrophile, which is more likely to attack the sites that can readily lose electrons.<sup>S6</sup> Thus, we calculated the Fukui index ( $f^+$  and  $f^0$ ) of TC for nucleophilic and radical attacks. In this study, the natural population analysis (NPA) charge is used to study the reactive sites, as it is considered to be one of the most suitable methods to calculate Fukui index.<sup>S7</sup>

## Experimental Figures

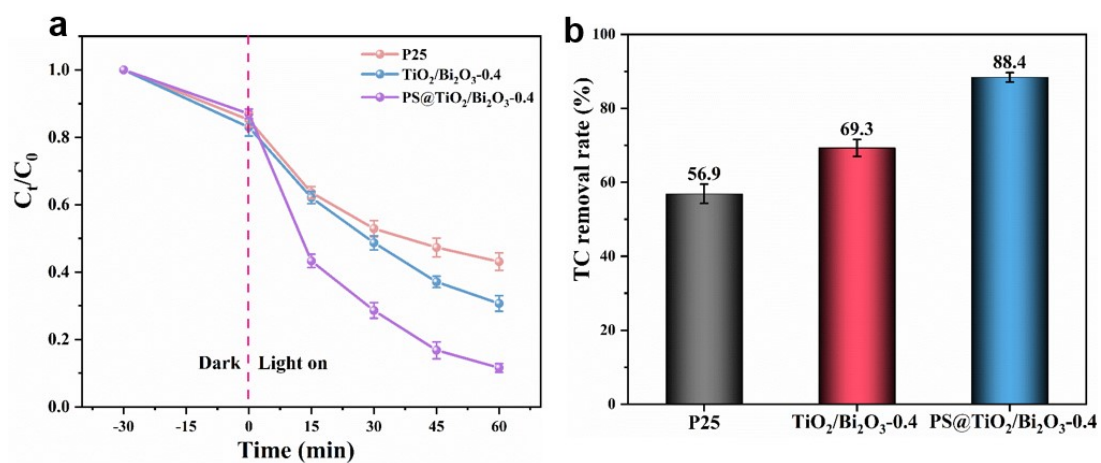

**Fig. S1.** Photodegradation of TC (a) and the TC removal rate over different photocatalysts. (New supplemented data)

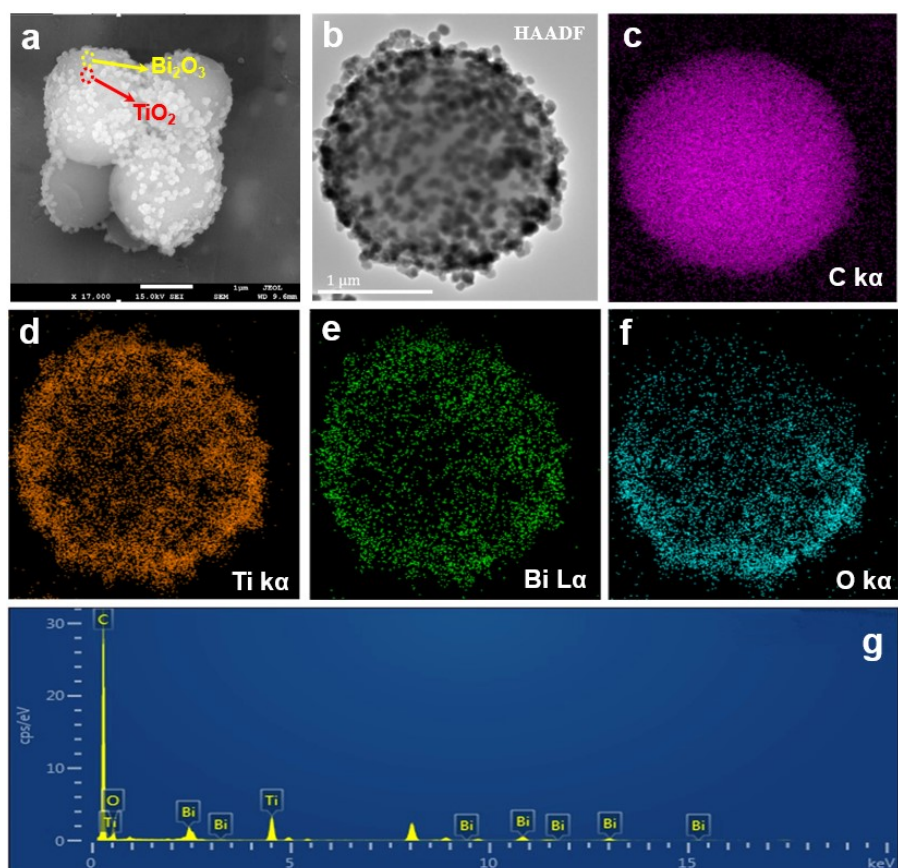



**Fig. S2** SEM (a) and STEM-EDS elemental mapping (b-f) of the PS@TiO<sub>2</sub>/Bi<sub>2</sub>O<sub>3</sub>-0.4 after 5 cycling test; EDS (g) of PS@TiO<sub>2</sub>/Bi<sub>2</sub>O<sub>3</sub>-0.4 after 5 cycle experiments of photocatalytic degradation of TC.  
**(New supplemented data)**

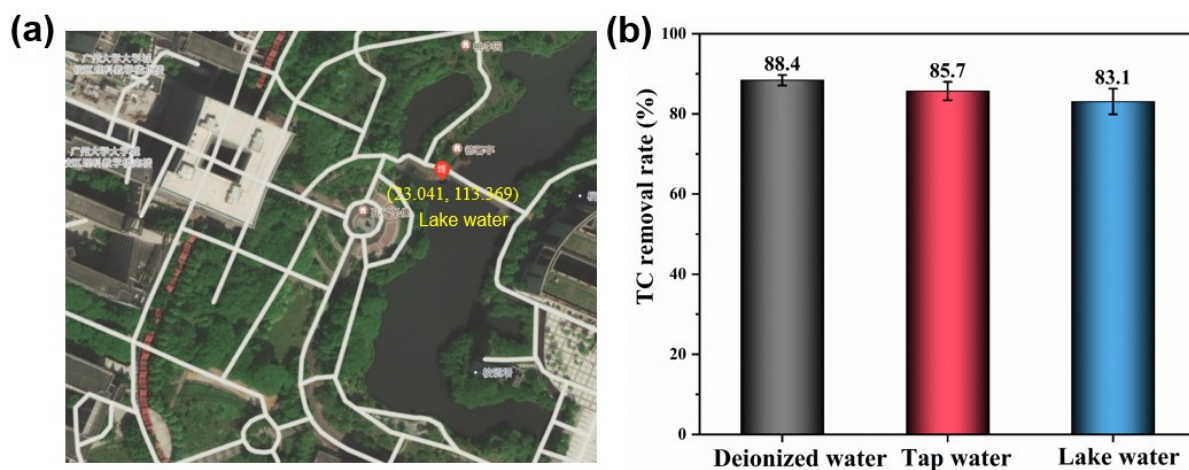

**Fig. S3.** (a) Natural water intake point (e.g. lake water); (b) Photocatalytic degradation of TC by PS@TiO<sub>2</sub>/Bi<sub>2</sub>O<sub>3</sub>-0.4 in different water quality.

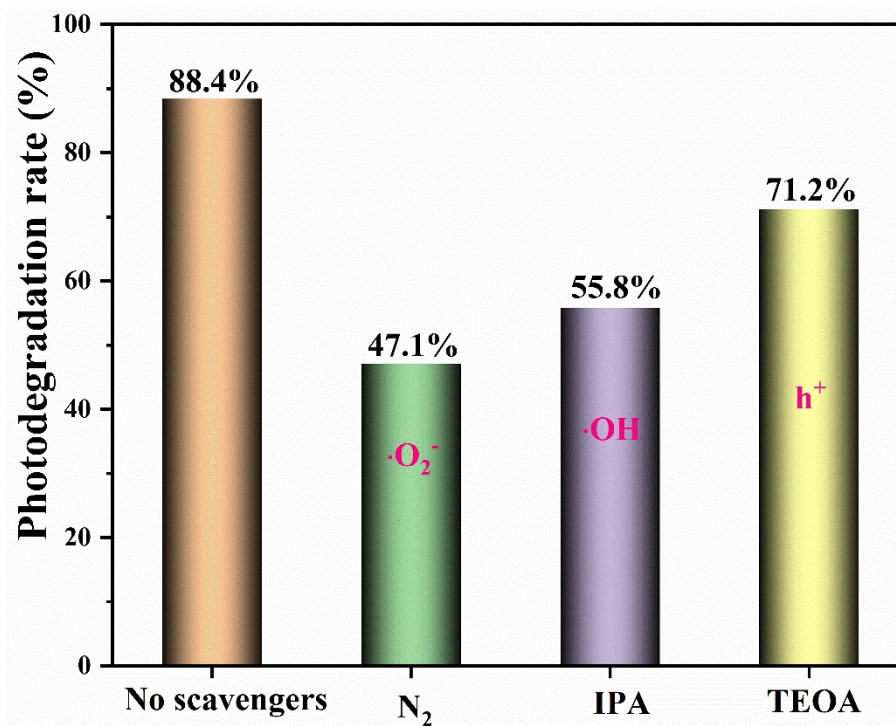

Fig. S4. Photocatalytic activities of TC over PS@TiO<sub>2</sub>/Bi<sub>2</sub>O<sub>3</sub>-0.4 with various scavengers.

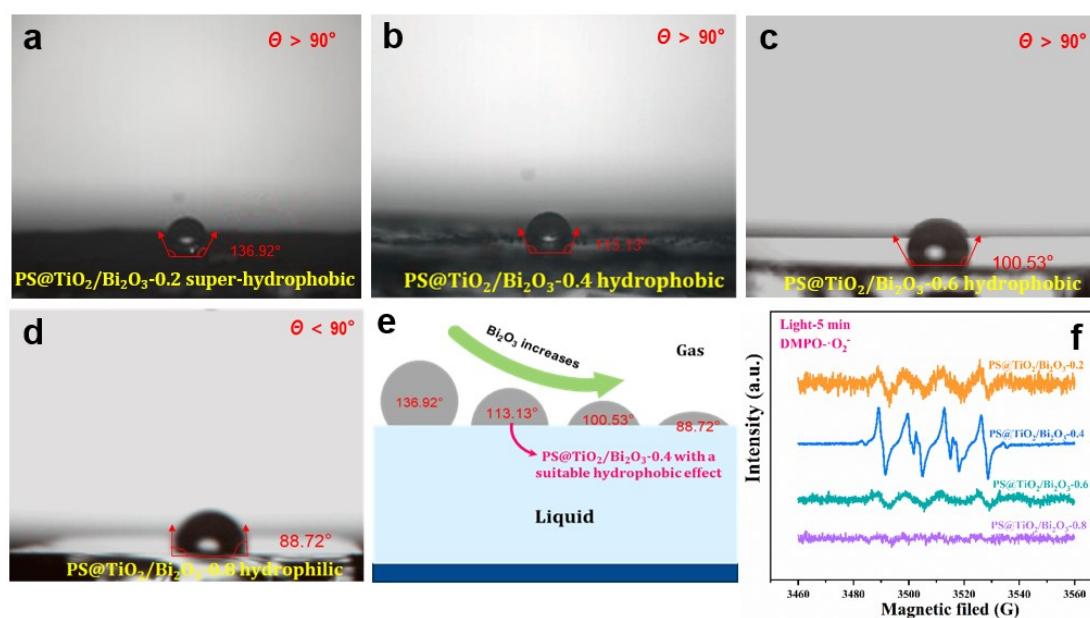

Fig. S5. The contact angle photographs on FTO tablets of PS@TiO<sub>2</sub>/Bi<sub>2</sub>O<sub>3</sub>-0.2 (a), PS@TiO<sub>2</sub>/Bi<sub>2</sub>O<sub>3</sub>-0.4 (b), PS@TiO<sub>2</sub>/Bi<sub>2</sub>O<sub>3</sub>-0.6 (c) and PS@TiO<sub>2</sub>/Bi<sub>2</sub>O<sub>3</sub>-0.8 (d); (e)

Schematic diagram of hydrophilicity and hydrophobicity of PS@TiO<sub>2</sub>/Bi<sub>2</sub>O<sub>3</sub>-x samples (x stands for 0.2, 0.4, 0.6 and 0.8); (f) EPR spectra of DMPO-·O<sub>2</sub><sup>-</sup> of the as-constructed PS@TiO<sub>2</sub>/Bi<sub>2</sub>O<sub>3</sub>-x samples. **(New supplemented data)**

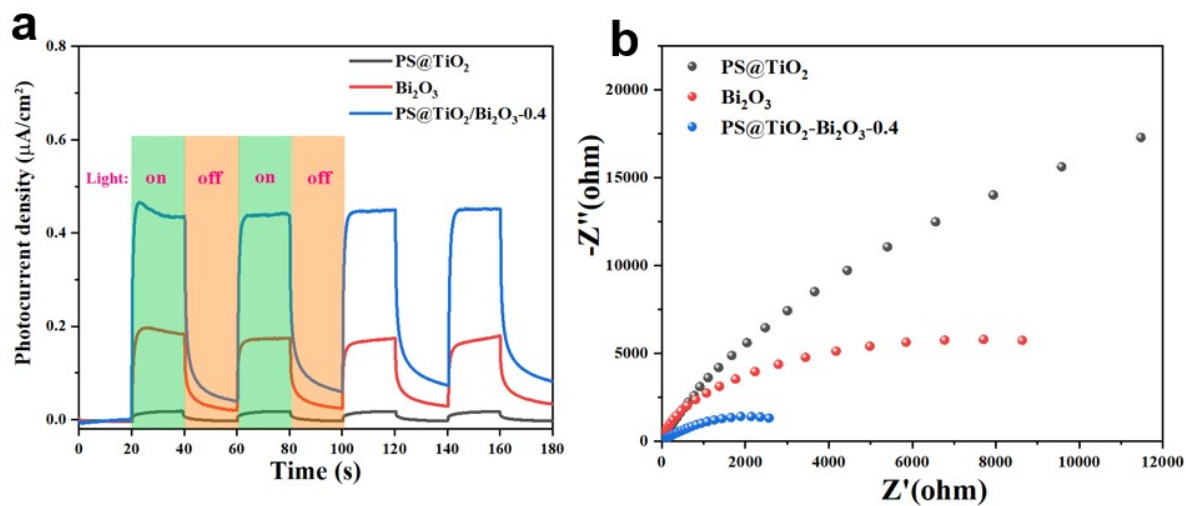

**Fig. S6.** Transient photocurrent response (a) and electrochemical impedance (b) spectra of PS@TiO<sub>2</sub>, Bi<sub>2</sub>O<sub>3</sub> and PS@TiO<sub>2</sub>-Bi<sub>2</sub>O<sub>3</sub>-0.4.

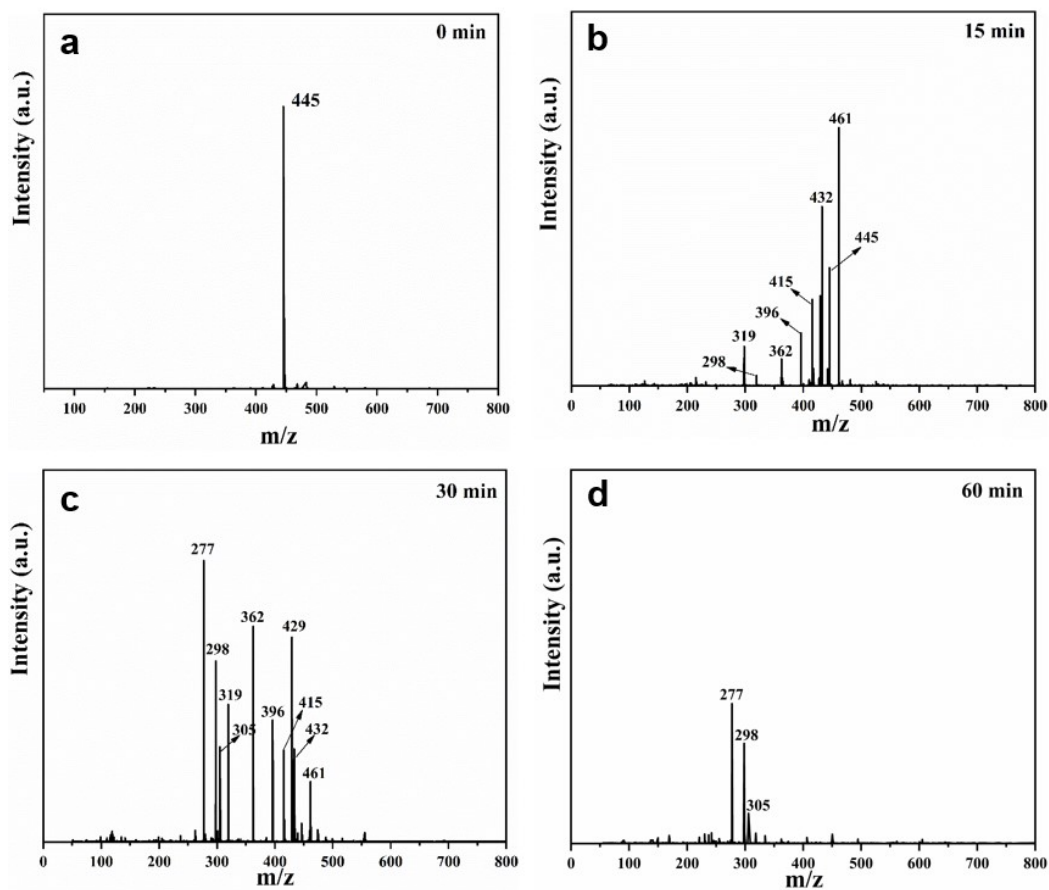

Fig. S7. LC-MS spectra of possible intermediates of TC at different reaction time.

## Experimental Tables

**Table S1.** Comparison of photocatalysts toward the removal of TC.

| Pollutants | Catalyst                                                                 | Operating conditions                                                                         | Degradation               |           |
|------------|--------------------------------------------------------------------------|----------------------------------------------------------------------------------------------|---------------------------|-----------|
|            |                                                                          |                                                                                              | efficiency (k value)      | Ref.      |
| TC         | PS@TiO <sub>2</sub> /Bi <sub>2</sub> O <sub>3</sub> -<br>0.4             | initial concentration:<br>50 mg L <sup>-1</sup><br>Catalyst dosage:<br>0.2 g L <sup>-1</sup> | 0.03318 min <sup>-1</sup> | This work |
| TC         | TiO <sub>2</sub> /Bi <sub>2</sub> O <sub>3</sub>                         | initial concentration:<br>15 mg L <sup>-1</sup><br>Catalyst dosage:<br>0.4 g L <sup>-1</sup> | 0.0165 min <sup>-1</sup>  | [S8]      |
| TC         | In <sub>2</sub> Se <sub>3</sub> (EDTA-<br>0.04 M)                        | initial concentration:<br>20 mg L <sup>-1</sup><br>Catalyst dosage: 0.5<br>g L <sup>-1</sup> | 0.0175 min <sup>-1</sup>  | [S9]      |
| TC         | Bi <sub>2</sub> O <sub>3</sub> QDs/<br>g-C <sub>3</sub> N <sub>4</sub>   | initial concentration:<br>10 mg L <sup>-1</sup><br>Catalyst dosage: 0.1<br>g L <sup>-1</sup> | 0.0144 min <sup>-1</sup>  | [S10]     |
| TC         | SZK-0.75                                                                 | initial concentration:<br>40 mg L <sup>-1</sup><br>Catalyst dosage: 0.2<br>g L <sup>-1</sup> | 0.0231 min <sup>-1</sup>  | [S11]     |
| TC         | ABO-290                                                                  | initial concentration:<br>40 mg L <sup>-1</sup><br>Catalyst dosage: 0.3<br>g L <sup>-1</sup> | 0.013 min <sup>-1</sup>   | [S12]     |
| TC         | $\alpha/\beta$ -<br>AgAl <sub>0.4</sub> Ga <sub>0.6</sub> O <sub>2</sub> | initial concentration:<br>10 mg L <sup>-1</sup><br>Catalyst dosage: 0.5<br>g L <sup>-1</sup> | 0.0161 min <sup>-1</sup>  | [S13]     |
| TC         | TCN-150                                                                  | initial concentration:<br>20 mg L <sup>-1</sup><br>Catalyst dosage:                          | 0.0206 min <sup>-1</sup>  | [S14]     |

0.25 g L<sup>-1</sup>

**Table S2.** Possible intermediates in the photocatalytic degradation of TC for PS@TiO<sub>2</sub>/Bi<sub>2</sub>O<sub>3</sub>-0.4 identified by LC-MS.

| Compound | [M + H] <sup>+</sup><br>(m/z) | Molecular<br>formula                                          | Possible structure                                                                   | 3D ball & stick<br>model                                                              |
|----------|-------------------------------|---------------------------------------------------------------|--------------------------------------------------------------------------------------|---------------------------------------------------------------------------------------|
| TC       | 445                           | C <sub>22</sub> H <sub>24</sub> N <sub>2</sub> O <sub>8</sub> | 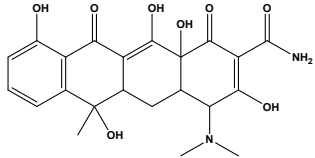   |    |
| P1       | 461                           | C <sub>22</sub> H <sub>24</sub> N <sub>2</sub> O <sub>9</sub> |   |   |
| P2       | 432                           | C <sub>20</sub> H <sub>17</sub> NO <sub>10</sub>              |  |  |
| P3       | 396                           | C <sub>15</sub> H <sub>9</sub> NO <sub>12</sub>               |  |  |
| P4       | 298                           | C <sub>11</sub> H <sub>7</sub> NO <sub>9</sub>                |  |  |
| P5       | 429                           | C <sub>22</sub> H <sub>24</sub> N <sub>2</sub> O <sub>7</sub> |  |  |

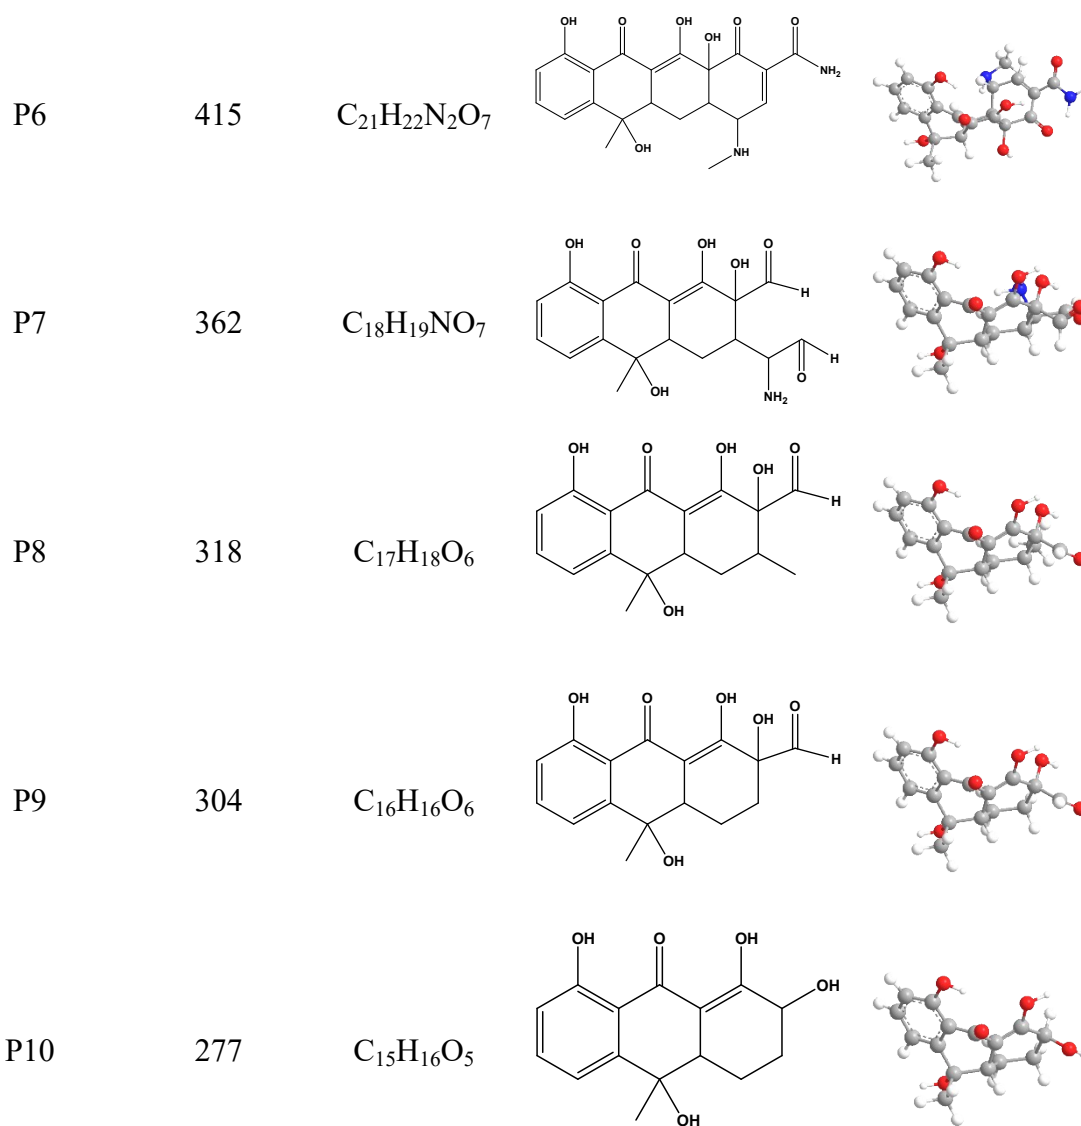

**Table S3.** Natural population analysis (NPA) charges and calculated Fukui index ( $f^+$  and  $f^0$ ) of TC for PS@TiO<sub>2</sub>/Bi<sub>2</sub>O<sub>3</sub>-0.4; The isosurface value is 0.004 e/Å<sup>3</sup>.

| Atom   | q (N)   | q (N+1) | q (N-1) | $f^+$  | $f^0$   |
|--------|---------|---------|---------|--------|---------|
| 1 (C)  | -0.0244 | -0.0884 | -0.0211 | 0.064  | 0.0336  |
| 2 (C)  | -0.066  | -0.0992 | -0.063  | 0.0332 | 0.0181  |
| 3 (C)  | 0.08    | 0.0363  | 0.0838  | 0.0437 | 0.0237  |
| 4 (C)  | -0.0389 | -0.0641 | -0.0363 | 0.0252 | 0.0139  |
| 5 (C)  | 0.0078  | -0.0284 | 0.0088  | 0.0362 | 0.0186  |
| 6 (C)  | -0.0631 | -0.0915 | -0.0591 | 0.0284 | 0.0162  |
| 7 (C)  | 0.2864  | 0.4983  | 0.5382  | 0.0399 | -0.1059 |
| 8 (C)  | -0.1100 | -0.2791 | -0.1876 | 0.0915 | 0.0845  |
| 9 (C)  | -0.0229 | -0.0289 | -0.0193 | 0.006  | 0.0048  |
| 10 (C) | 0.0923  | 0.0877  | 0.0936  | 0.0046 | 0.0029  |
| 11 (C) | 0.0876  | 0.0422  | 0.0985  | 0.0455 | 0.0282  |
| 12 (C) | 0.0741  | 0.0636  | 0.0797  | 0.0106 | 0.008   |
| 13 (C) | -0.0176 | -0.0215 | -0.0063 | 0.0038 | 0.0076  |
| 14 (C) | -0.0543 | -0.0593 | -0.0464 | 0.0049 | 0.0064  |
| 15 (C) | 0.1442  | 0.0817  | 0.1525  | 0.0625 | 0.0354  |
| 16 (C) | -0.0589 | -0.062  | -0.0351 | 0.0031 | 0.0134  |
| 17 (C) | 0.1299  | 0.0769  | 0.1345  | 0.0531 | 0.0288  |
| 18 (C) | 0.0278  | 0.0268  | 0.0525  | 0.001  | 0.0129  |
| 19 (O) | -0.2294 | -0.2673 | -0.2244 | 0.0379 | 0.0214  |
| 20 (O) | -0.3177 | -0.6379 | -0.5960 | 0.0419 | 0.1601  |
| 21 (O) | -0.1674 | -0.2252 | -0.1593 | 0.0578 | 0.033   |
| 22 (O) | -0.1349 | -0.1391 | -0.117  | 0.0041 | 0.011   |
| 23 (O) | -0.2961 | -0.7091 | -0.5706 | 0.1385 | 0.2065  |
| 24 (C) | 0.1551  | 0.1533  | 0.1622  | 0.0018 | 0.0045  |
| 25 (N) | -0.103  | -0.1047 | -0.0966 | 0.0017 | 0.004   |
| 26 (O) | -0.4033 | -0.4063 | -0.3903 | 0.003  | 0.008   |
| 27 (N) | -0.0789 | -0.0805 | 0.1617  | 0.0016 | 0.1211  |
| 28 (C) | -0.0567 | -0.0609 | -0.0289 | 0.0041 | 0.016   |
| 29 (C) | -0.2571 | -0.3294 | -0.2401 | 0.0723 | 0.0447  |
| 30 (C) | -0.0896 | -0.098  | -0.0882 | 0.0084 | 0.0049  |
| 31 (O) | -0.2281 | -0.2371 | -0.2259 | 0.009  | 0.0056  |
| 32 (O) | -0.23   | -0.2506 | -0.2192 | 0.0205 | 0.0157  |



**Table S4.** The acute toxic and chronic toxicity values of TC and degradable intermediate products obtained from ECOSAR program.

| Com<br>poun<br>ds | Acute toxicity (mg/L) |                      |                          | Chronic toxicity (mg/L) |               |                   | Chemical Class                            |
|-------------------|-----------------------|----------------------|--------------------------|-------------------------|---------------|-------------------|-------------------------------------------|
|                   | Fish (96 h, LC50)     | Daphnid (48 h, LC50) | Green Algae (96 h, EC50) | Fish (Chv)              | Daphnid (Chv) | Green Algae (Chv) |                                           |
| TC                | 13100                 | 1060                 | 1890                     | 2490                    | 59.9          | 474               | Aliphatic Amines                          |
|                   | 11800                 | 1130                 | 914                      | 831                     | 69.5          | 879               | Phenols                                   |
|                   | 156000                | 293000               | 89200                    | 192000                  | 22100         | 7040              | Vinyl/Allyl/Propargyl Ketones             |
|                   | 115000                | 70500                | 8560                     | 5010                    | 5060          | 1780              | Benzyl Alcohols                           |
|                   | 784                   | 1910                 | 3.3                      | 43.2                    | 7.35          | 0.789             | Acrylamides                               |
|                   | 78.5                  | 302                  | 14.5                     | 362                     | 72.5          | 130               | Vinyl/Allyl/Propargyl Alcohols-Unhindered |
|                   | 4400                  | 1690                 | 315                      | 381                     | 143           | 1260              | Ketone Alcohols                           |
|                   | 226                   | 5.30                 | 23.8                     | 1.29                    | 1.25          | 3.28              | Phenol Amines                             |
| P1                | 1300                  | 126                  | 157                      | 142                     | 8.48          | 44.9              | Aliphatic Amines                          |
|                   | 1050                  | 203                  | 86.2                     | 86.6                    | 16.3          | 120               | Phenols                                   |
|                   | 10600                 | 12300                | 5100                     | 6770                    | 1290          | 774               | Vinyl/Allyl/Propargyl Ketones             |
|                   | 5150                  | 3550                 | 783                      | 311                     | 377           | 246               | Benzyl Alcohols                           |
|                   | 115                   | 294                  | 1.46                     | 5.99                    | 1.62          | 0.394             | Acrylamides                               |
|                   | 28.8                  | 92.6                 | 3.44                     | 36.1                    | 10.9          | 27.2              | Vinyl/Allyl/Propargyl Alcohols-Unhindered |
|                   | 369                   | 186                  | 42.3                     | 37.8                    | 19.3          | 182               | Ketone Alcohols                           |
|                   | 49.4                  | 2.72                 | 7.01                     | 0.393                   | 0.589         | 1.11              | Phenol Amines                             |
| P2                | 187                   | 58.2                 | 16.0                     | 17.2                    | 5.61          | 28.5              | Phenols                                   |
|                   | 1580                  | 1320                 | 674                      | 646                     | 173           | 159               | Vinyl/Allyl/Propargyl Ketones             |
|                   | 575                   | 431                  | 142                      | 43.6                    | 59.7          | 59.2              | Benzyl Alcohols                           |
|                   | 28.6                  | 75.7                 | 0.771                    | 1.44                    | 0.535         | 0.225             | Acrylamides                               |
|                   | 13.4                  | 38.1                 | 1.19                     | 6.97                    | 2.79          | 8.64              | Vinyl/Allyl/Propargyl Alcohols-Unhindered |
|                   | 63.3                  | 38.3                 | 9.97                     | 7.25                    | 4.57          | 46.1              | Ketone Alcohols                           |

|    |        |          |        |        |        |        |                                           |
|----|--------|----------|--------|--------|--------|--------|-------------------------------------------|
| P3 | 152000 | 3300000  | 26700  | 1940   | 77600  | 1640   | Amides                                    |
|    | 0      |          |        |        |        |        |                                           |
|    | 95900  | 26300    | 3780   | 6740   | 1710   | 13600  | Ketone Alcohols                           |
| P4 | 522000 | 15600000 | 422000 | 2610   | 168000 | 10101  | Amides                                    |
|    | 00     | 0        |        | 0      | 0      |        |                                           |
|    | 226000 | 428000   | 46800  | 1270   | 21100  | 150000 | Ketone Alcohols                           |
|    | 0      |          |        | 00     |        |        |                                           |
| P5 | 3320   | 297      | 431    | 459    | 18.5   | 116    | Aliphatic Amines                          |
|    | 2800   | 402      | 224    | 216    | 28.7   | 266    | Phenols                                   |
|    | 31800  | 45300    | 16400  | 2690   | 4120   | 1890   | Vinyl/Allyl/Propargyl Ketones             |
|    | 18500  | 12100    | 2060   | 968    | 1080   | 544    | Benzyl Alcohols                           |
|    | 247    | 620      | 1.96   | 1.32   | 2.93   | 0.501  | Acrylamides                               |
|    | 41.8   | 145      | 6.02   | 91.7   | 23.3   | 50.3   | Vinyl/Allyl/Propargyl Alcohols-Unhindered |
|    | 1010   | 454      | 94.6   | 96.2   | 43.2   | 398    | Ketone Alcohols                           |
|    | 89.5   | 3.42     | 11.2   | 0.618  | 0.77   | 1.67   | Phenol Amines                             |
| P6 | 4410   | 386      | 587    | 658    | 23.5   | 156    | Aliphatic Amines                          |
|    | 3780   | 493      | 301    | 285    | 34     | 339    | Phenols                                   |
|    | 44600  | 67800    | 23600  | 4120   | 5900   | 2480   | Vinyl/Allyl/Propargyl Ketones             |
|    | 27400  | 17600    | 2780   | 1370   | 1500   | 692    | Benzyl Alcohols                           |
|    | 312    | 777      | 2.13   | 16.8   | 3.5    | 0.535  | Acrylamides                               |
|    | 46.6   | 166      | 7.12   | 122    | 29.3   | 60.5   | Vinyl/Allyl/Propargyl Alcohols-Unhindered |
|    | 1370   | 596      | 121    | 128    | 55.1   | 503    | Ketone Alcohols                           |
|    | 107    | 3.64     | 12.8   | 0.705  | 0.829  | 1.88   | Phenol Amines                             |
| P7 | 20900  | 1610     | 3160   | 4630   | 86.1   | 764    | Aliphatic Amines                          |
|    | 19400  | 1520     | 1480   | 1300   | 86.4   | 1280   | Phenols                                   |
|    | 277000 | 597000   | 166000 | 412000 | 41000  | 10900  | Vinyl/Allyl/Propargyl Ketones             |
|    | 231000 | 136000   | 13900  | 9110   | 8740   | 2580   | Benzyl Alcohols                           |
|    | 85.9   | 348      | 18     | 574    | 102    | 167    | Vinyl/Allyl/Propargyl Alcohols-Unhindered |
|    | 148    | 265      | 40     | 27.2   | 74.4   | 10.2   | Aldehydes (Poly)                          |
|    | 122    | 249000   | 35100  | 0.317  | 7840   | 1440   | Vinyl/Allyl/Propargyl Aldehydes           |

|     |       |      |       |       |      |      |                                           |
|-----|-------|------|-------|-------|------|------|-------------------------------------------|
|     | 286   | 5.27 | 27.7  | 1.48  | 1.28 | 3.67 | Phenol Amines                             |
|     | 304   | 75.6 | 25.5  | 26.6  | 6.67 | 40.5 | Phenols                                   |
|     | 2810  | 2740 | 1260  | 1420  | 322  | 242  | Vinyl/Allyl/Propargyl Ketones             |
|     | 1170  | 842  | 229   | 79.6  | 103  | 83.5 | Benzyl Alcohols                           |
| P8  | 13.8  | 41.6 | 1.41  | 10.9  | 3.83 | 10.7 | Vinyl/Allyl/Propargyl Alcohols-Unhindered |
|     | 0.612 | 1850 | 637   | 0.041 | 103  | 64.2 | Vinyl/Allyl/Propargyl Aldehydes           |
|     | 563   | 116  | 46.6  | 47.1  | 9.51 | 66.8 | Phenols                                   |
|     | 5590  | 6210 | 2640  | 3360  | 669  | 424  | Vinyl/Allyl/Propargyl Ketones             |
|     | 2610  | 1820 | 421   | 162   | 200  | 137  | Benzyl Alcohols                           |
| P9  | 17.4  | 55.2 | 2.01  | 19.6  | 6.15 | 15.7 | Vinyl/Allyl/Propargyl Alcohols-Unhindered |
|     | 0.642 | 3870 | 1150  | 0.053 | 196  | 100  | Vinyl/Allyl/Propargyl Aldehydes           |
|     | 99.1  | 32.6 | 8.53  | 9.22  | 3.2  | 15.6 | Phenols                                   |
|     | 822   | 661  | 345   | 319   | 88.8 | 85.9 | Vinyl/Allyl/Propargyl Ketones             |
| P10 | 289   | 219  | 75.6  | 22.5  | 31.2 | 32.5 | Benzyl Alcohols                           |
|     | 7.91  | 22.2 | 0.679 | 3.73  | 1.54 | 4.89 | Vinyl/Allyl/Propargyl Alcohols-Unhindered |

## References

- [S1]S. H. Park, J. Kim, W. E. Lee, D. J. Byun, M. H. Kim, *Langmuir*, 2017, **33(9)**, 2275-2282.
- [S2]D. Ma, J. Zhao, Z. Yan, X. Hao, L. Li, Z. Li, *Colloid. Surface. A*, 2012, **395**, 276-283.
- [S3]B. He, Z. Wang, P. Xiao, T. Chen, J. Yu, L. Zhang, *Adv. Materi*, 2022, **34(38)**, 2203225.

- [S4]H. Li, S. Sun, H. Ji, W. Liu, Z. Shen, *Appl. Catal., B*, 2020, **272**, 118966.
- [S5]R. G. Parr, W. T. Yang, *J. Am. Chem. Soc.*, 1984, **106**, 4049-4050.
- [S6]F. D. Vleeschouwer, V. V. Speybroeck, M. Waroquier, P. Geerlings, F. D. Proft, *Org. Lett.*, 2007, **9**, 2721-2724.
- [S7]J. Olah, C. Van Alsenoy, A. B. Sannigrahi, *J. Phys. Chem. A*, 2002, **106**, 3885-3890.
- [S8]Z. Yin, X. Zhang, X. Yuan, W. Wei, Y. Xiao, S. Cao, *J. Clean. Prod.*, 2022, **375**, 134112.
- [S9]X. Wei, H. Feng, L. Li, J. Gong, K. Jiang, S. Xue, Paul K. Chu, *Appl. Catal., B*, 2020, **260**, 118218.
- [S10] Y. Liang, W. Xu, J. Fang, Z. Liu, D. Chen, T. Pan, Y. Yu, Z. Fang, *Appl. Catal., B*, 2021, **295**, 120279.
- [S11] Y. Li, B. Yu, Z. Hu, H. Wang, *Chem. Eng. J.*, 2022, **429**, 132105.
- [S12] W. Wu, Y. Sun, H. Zhou, *Chem. Eng. J.*, 2022, **432**, 134316.
- [S13] X. Hou, Z. Wang, J. Chen, J. Wang, Q. Lu, D. Wu, *Chem. Eng. J.*, 2021, **414**, 128915.
- [S14] X. Hu, Y. Yu, D. Chen, W. Xu, J. Fang, Z. Liu, R. Li, L. Yao, J. Qin, Z. Fang, *Chem. Eng. J.*, 2022, **432**, 134375.
